# Supplementary material for: Antihyperlipidemic and Antioxidant Effects of Averrhoa Carambola Extract in High-Fat Diet-Fed Rats
Source: PubMed Central journal article supplement (PMC6784245; doi:10.3390/biomedicines7030072), 2019-09-16
Supplement: biomedicines-07-00072-s001.pdf [file biomedicines-07-00072-s001.pdf]

## Supplementary material

### Antihyperlipidemic and antioxidant effects of *Averrhoa carambola* extract in high fat diet-fed rats

Saleem H. Aladaileh<sup>1</sup>, Sultan A. M. Saghir<sup>1,2,\*</sup>, Kisantini Murugesu<sup>2</sup>, Amirin Sadikun<sup>3</sup>, Ashfaq Ahmad<sup>4</sup>, Gurjeet Kaur<sup>5</sup>, Ayman M. Mahmoud<sup>6</sup> and Vikneswaran Murugaiya<sup>2</sup>

Table S1. LOD, LOQ and linearity of standard curves for apigenin.

| Retention time/min. | Linear range ( $\mu\text{g/mL}$ ) | LOD ( $\mu\text{g/mL}$ ) | LOQ ( $\mu\text{g/mL}$ ) | R <sup>2</sup> |
|---------------------|-----------------------------------|--------------------------|--------------------------|----------------|
| 13.56               | 0.625–50.00                       | 0.15                     | 0.63                     | 0.999          |

Table S2. Contents of apigenin in methanolic extract (5 mg/mL) of *Averrhoa carambola* leaf.

| Apigenin                                       | Calibration curve     | Amount ( $\mu\text{g/mg}$ ) |
|------------------------------------------------|-----------------------|-----------------------------|
| Methanolic extract of <i>A. carambola</i> leaf | $y = 42.882x - 26.83$ | 4.83                        |

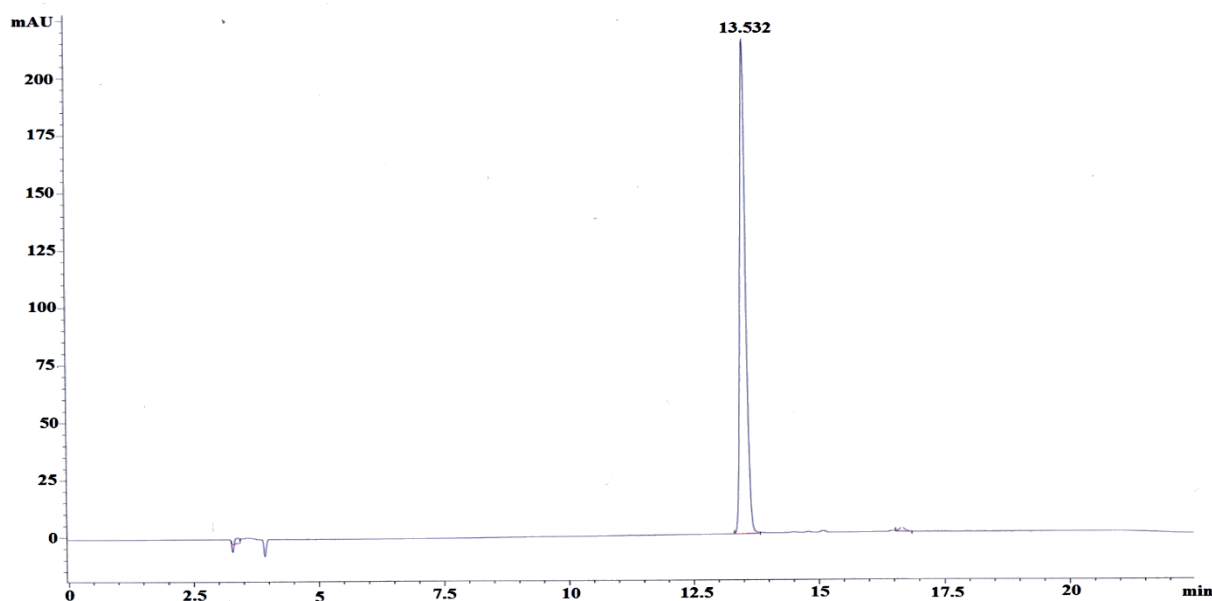

Figure S1. HPLC chromatogram for apigenin standard at 0.1  $\mu\text{g/ml}$  methanol.

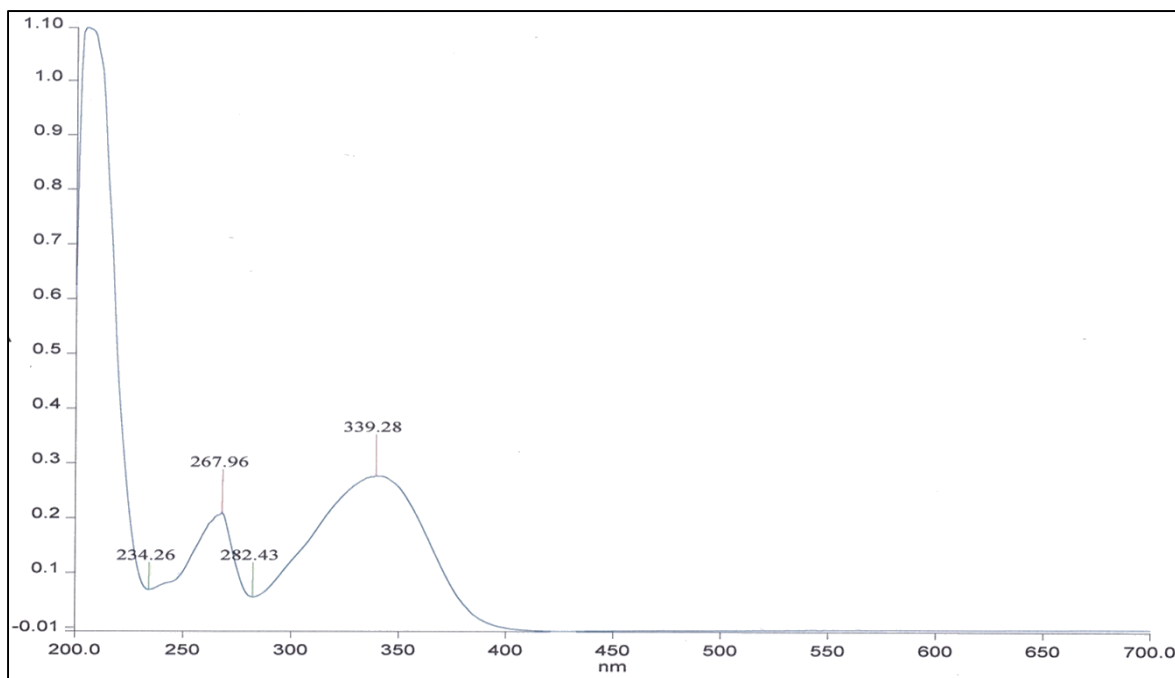

Figure S2. UV-vis spectrum of apigenin.

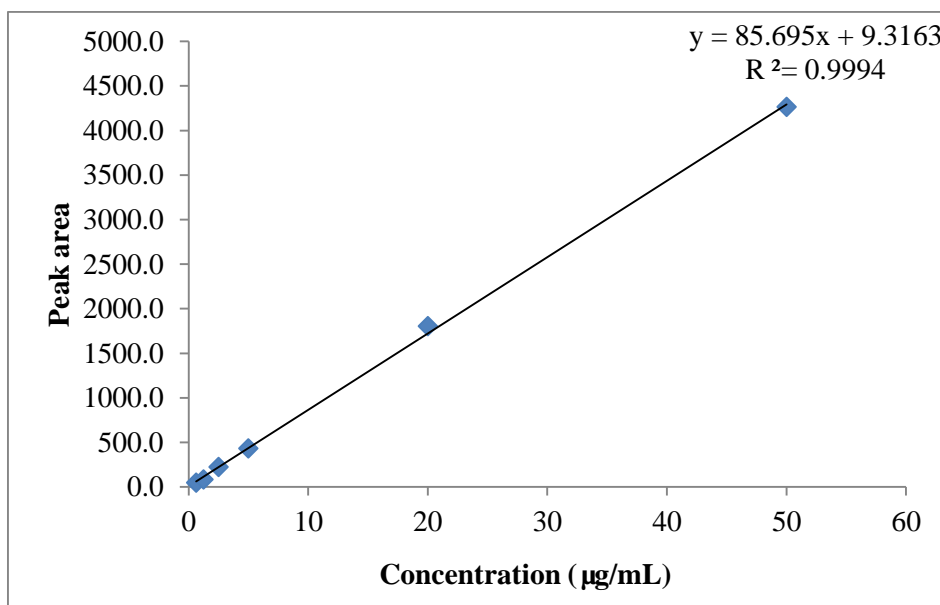

Figure S3. A typical calibration curve of apigenin (50–0.625 µg/mL).
